# Supplementary material
Source: MDPI journal article supplement (https://www.mdpi.com/2073-4344/14/1/79)
Supplement: s1 [file s1]

## Supplementary Information for:

### Influence of the $\text{La}_{0.2}\text{Sr}_{0.7}\text{Ti}_{0.95}\text{Ni}_{0.05}\text{O}_3$ (LSTN) Synthesis Method on SOFC Anode Performance

#### Supplementary Tables

**Table S1.** Rietveld refined lattice parameters, lattice strain and phase content of LSTN samples before and after exsolution, refined to cubic Pm-3m structure (PDF card no. 00-005-0634) and tetragonal I4/mcm (PDF card no. 04-025-4518).

|    |                   | Cubic Pm-3m |         |      | Tetragonal I4/mcm |           |        |      |
|----|-------------------|-------------|---------|------|-------------------|-----------|--------|------|
|    |                   | $a_0$ (Å)   | $e_0$   | wt%  | $a_0$ (Å)         | $c_0$ (Å) | $e_0$  | wt%  |
| SS | Before exsolution | 3.905       | 0.0006  | 87.1 | 5.511             | 7.847     | 0.018  | 12.9 |
|    | After exsolution  | 3.904       | 0.0005  | 92.5 | 5.72              | 8.832     | 0.018  | 7.5  |
| SG | Before exsolution | 3.904       | 0.0013  | 96.3 | 5.751             | 8.026     | 0.013  | 3.7  |
|    | After exsolution  | 3.904       | 0.0008  | 92.5 | 5.765             | 8.156     | 0.011  | 7.5  |
| HT | Before exsolution | 3.914       | 0.0009  | 63.5 | 5.67              | 8.026     | 0.0036 | 36.5 |
|    | After exsolution  | 3.907       | 0.00001 | 84.1 | 5.788             | 7.883     | 0.01   | 15.9 |
| CP | Before exsolution | 4.963       | 0.0061  | 7.3  | 5.521             | 7.85      | 0.0008 | 92.7 |
|    | After exsolution  | 3.911       | 0.001   | 89.9 | 5.769             | 7.963     | 0.015  | 10.1 |

**Table S2.** LSTN elements ratios (in percentage) as measured by XPS before and after sputtering and by EDX elemental analysis. Nominal ratios are calculated according to intended stoichiometry  $\text{Sr}_{0.7}\text{La}_{0.2}\text{Ti}_{0.95}\text{Ni}_{0.05}\text{O}_{3-\delta}$ .

|         |                       | Sr   | La   | Ti   | Ni  | Sr/La | Ti/Ni |
|---------|-----------------------|------|------|------|-----|-------|-------|
| nominal |                       | 36.8 | 10.5 | 50.0 | 2.6 | 3.5   | 19.0  |
| SS      | XPS before sputtering | 42.4 | 10.3 | 46.8 | 0.5 | 4.1   | 93.6  |
|         | XPS after sputtering  | 42.2 | 14.0 | 43.3 | 0.5 | 3.0   | 86.6  |
|         | EDX                   | 33.6 | 10.6 | 53.2 | 2.6 | 3.2   | 20.5  |
| SG      | XPS before sputtering | 49.5 | 9.6  | 40.4 | 0.5 | 5.2   | 80.8  |
|         | XPS after sputtering  | 45.1 | 13.8 | 40.6 | 0.4 | 3.3   | 101.5 |
|         | EDX                   | 32.5 | 9.3  | 53.5 | 4.7 | 3.5   | 11.4  |
| HT      | XPS before sputtering | 36.4 | 25.9 | 34.6 | 3.1 | 1.4   | 11.2  |
|         | XPS after sputtering  | 42.8 | 20.4 | 36.0 | 0.9 | 2.1   | 40.0  |
|         | EDX                   | 40.1 | 12.3 | 44.4 | 3.2 | 3.3   | 13.9  |
| CP      | XPS before sputtering | 38.9 | 15.3 | 45.1 | 0.7 | 2.5   | 64.4  |
|         | XPS after sputtering  | 41.1 | 16.1 | 42.2 | 0.6 | 2.6   | 70.3  |
|         | EDX                   | 31.9 | 11.1 | 54.6 | 2.3 | 2.9   | 23.7  |

**Table S3.** XPS binding energies (in eV) of LSTN elements signals before and after 3 minutes Ar sputtering. Full widths at half maximum (FWHM) are given in brackets. Secondary peaks are given below the main peaks.

|                   | O 1s | Sr 3d <sub>5/2</sub> | ΔSr 3d      | Ti 2p <sub>3/2</sub> | ΔTi 2p      | La 3d <sub>5/2</sub> | ΔLa 3d | La 4d <sub>5/2</sub> | ΔLa 4d      | Ni 2p <sub>1/2</sub> | Ni 2p sat  | Ni 3p      |
|-------------------|------|----------------------|-------------|----------------------|-------------|----------------------|--------|----------------------|-------------|----------------------|------------|------------|
| Before sputtering | SS   | 133.3 (1.1)          | 1.6         | 458.7 (1.1)          | 5.1         | 834.4 (3.1)          | 16.8   | 102.5 (2.6)          | 3.0         |                      |            |            |
|                   |      | 132.8 (2.5)          |             | 457.6 (2.1)          |             | 837.5 (2.1)          | 16.8   |                      |             |                      |            |            |
|                   | SG   | 132.8 (1.2)          | 1.6         | 458.2 (1.2)          | 5.5         | 833.9 (2.3)          | 16.7   | 101.9 (2.1)          | 3.1         |                      |            |            |
|                   |      | 132.0 (2)            |             | 457.5 (2)            |             | 836.4 (2.3)          | 16.8   |                      |             |                      |            |            |
|                   | HT   | 132.9 (1.2)          | 1.6         | 458.2 (1.3)          | 5.6         | 834.5 (2.6)          | 16.8   | 102.5 (2.4)          | 3.1         | 872.5 (2.4)          | 6.3        |            |
|                   |      | 132.2 (1.9)          |             | 457.8 (2.1)          |             | 836.8 (1.9)          | 17.3   |                      |             | 874.3 (2.4)          |            |            |
| CP                |      | 132.9 (1)            | 1.7         | 458.3 (1.1)          | 5.8         | 834.1 (1.6)          | 16.9   | 102.2 (1.8)          | 3.1         | 872.7 (1.6)          |            |            |
|                   |      |                      |             |                      |             | 835.7 (3.4)          | 16.6   |                      |             | 874.2 (3)            |            |            |
| After sputtering  | SS   | 529.9 (1.3)          | 133.2 (1.3) | 1.7                  | 458.3 (1.2) | 5.3                  |        | 102.2 (1.8)          | 3.1         |                      |            | 65.8 (2.4) |
|                   |      | 531.3 (2)            |             |                      | 457.4 (4.5) |                      |        |                      |             |                      |            | 67.7 (2.3) |
|                   | SG   | 529.9 (1.4)          | 133.1 (1.4) | 1.7                  | 458.1 (1.3) | 5.5                  |        |                      | 102.2 (1.8) | 3.1                  |            | 65.6 (2.2) |
|                   |      | 531.6 (1.9)          |             |                      | 457.0 (3.6) |                      |        |                      |             |                      |            | 67.6 (1.9) |
|                   | HT   | 530.0 (2)            | 133.4 (1.9) | 1.8                  | 458.3 (1.5) | 5.4                  |        |                      | 102.0 (2.2) | 3.1                  |            | 66.1 (2.8) |
|                   |      | 532.0 (1.6)          |             |                      | 457.5 (2.3) |                      |        |                      |             |                      |            | 68.0 (2.5) |
| CP                |      | 530.1 (1.3)          | 133.4 (1.3) | 1.7                  | 458.3 (1.2) | 5.6                  |        | 102.2 (1.8)          | 3.0         |                      | 66.0 (2.4) |            |
|                   |      | 531.7 (2)            |             |                      | 457.0 (4)   |                      |        |                      |             |                      | 67.9 (2.2) |            |

**Table S4.** Resistivity values obtained from fitting the impedance spectra of fuel cells with LSTN-GDC anodes to the equivalent circuit shown in figure 6.  $R_s$  is the ohmic resistance,  $R_1$  is from high frequency impedance,  $R_2$  is from medium frequency impedance,  $R_3$  is from low frequency impedance,  $R_p$  is the total polarization resistivity equal to  $R_1+R_2+R_3$  and  $\sigma$  is the conductivity according to the ohmic resistance and cell thickness.

|    |                  | $R_s (\Omega \text{ cm}^2)$ | $R_1 (\Omega \text{ cm}^2)$<br>~3 kHz | $R_2 (\Omega \text{ cm}^2)$<br>~6 Hz | $R_3 (\Omega \text{ cm}^2)$<br>~0.2 Hz | $R_p (\Omega \text{ cm}^2)$ | $\sigma (\text{S/cm})$ |
|----|------------------|-----------------------------|---------------------------------------|--------------------------------------|----------------------------------------|-----------------------------|------------------------|
| SS | Before stability | 1.97                        | -                                     | 0.32                                 | 0.58                                   | 0.90                        | 0.0054                 |
|    | After stability  | 1.45                        | 0.23                                  | 0.24                                 | 0.76                                   | 1.23                        | 0.0074                 |
| SG | Before stability | 1.98                        | -                                     | 0.38                                 | 0.60                                   | 0.99                        | 0.0061                 |
|    | After stability  | 1.75                        | -                                     | 0.48                                 | 0.70                                   | 1.18                        | 0.0069                 |
| HT | Before stability | 3.20                        | 0.73                                  | 3.61                                 | 17.87                                  | 22.21                       | 0.0032                 |
|    | After stability  | 2.34                        | 1.69                                  | 2.98                                 | -                                      | 4.67                        | 0.0044                 |
| CP | Before stability | 1.81                        | -                                     | 0.54                                 | 0.96                                   | 1.49                        | 0.0057                 |
|    | After stability  | 1.35                        | 0.20                                  | 0.75                                 | 0.36                                   | 1.31                        | 0.0077                 |

## Supplementary Figures

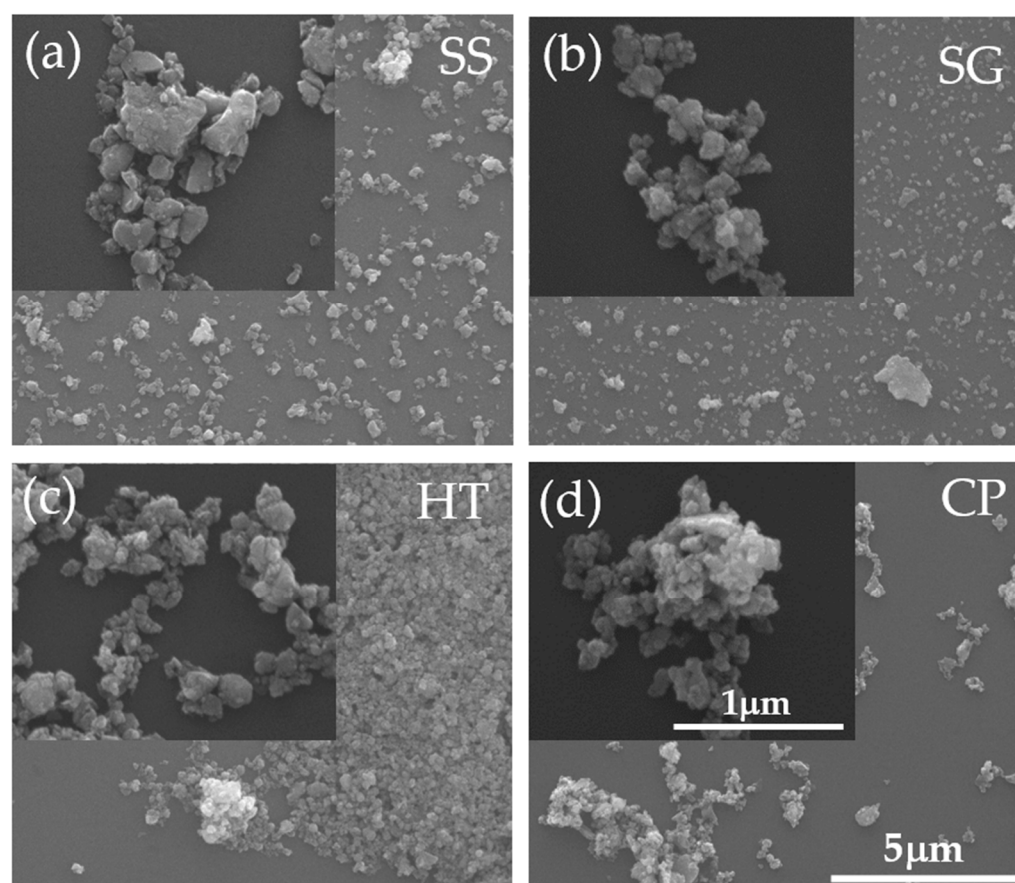

**Figure S1.** SEM micrographs of LSTN powders prepared by (a) solid state reaction (SS), (b) sol-gel (SG), (c) hydrothermal (HT) and (d) co-precipitation (CP) methods after identical ball milling process. Scale bars for CP sample apply for all.

(a)

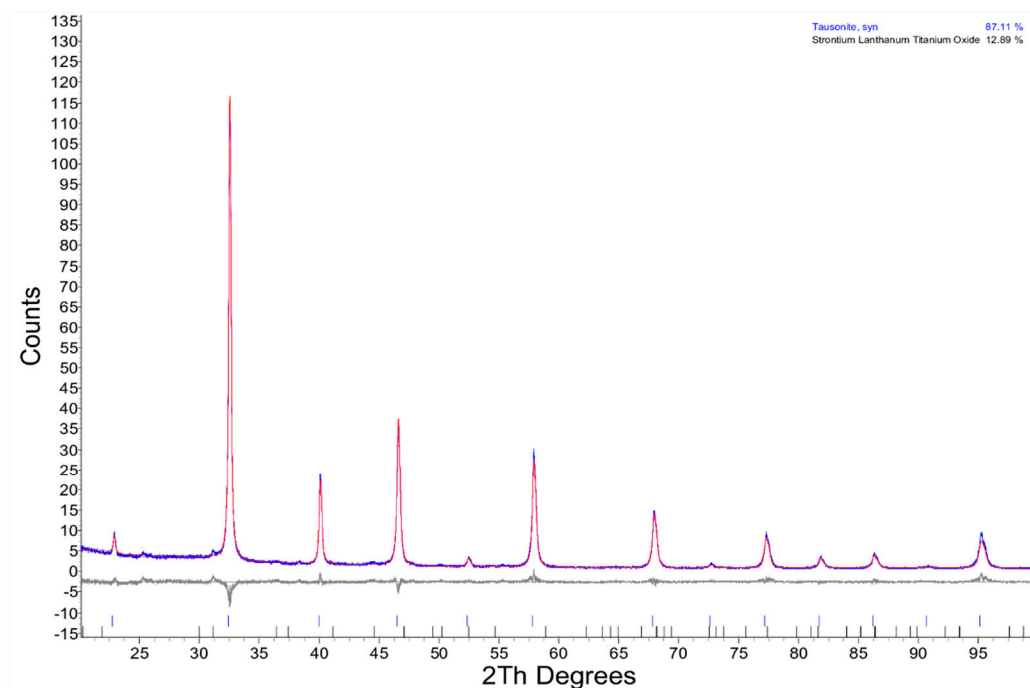

(b)

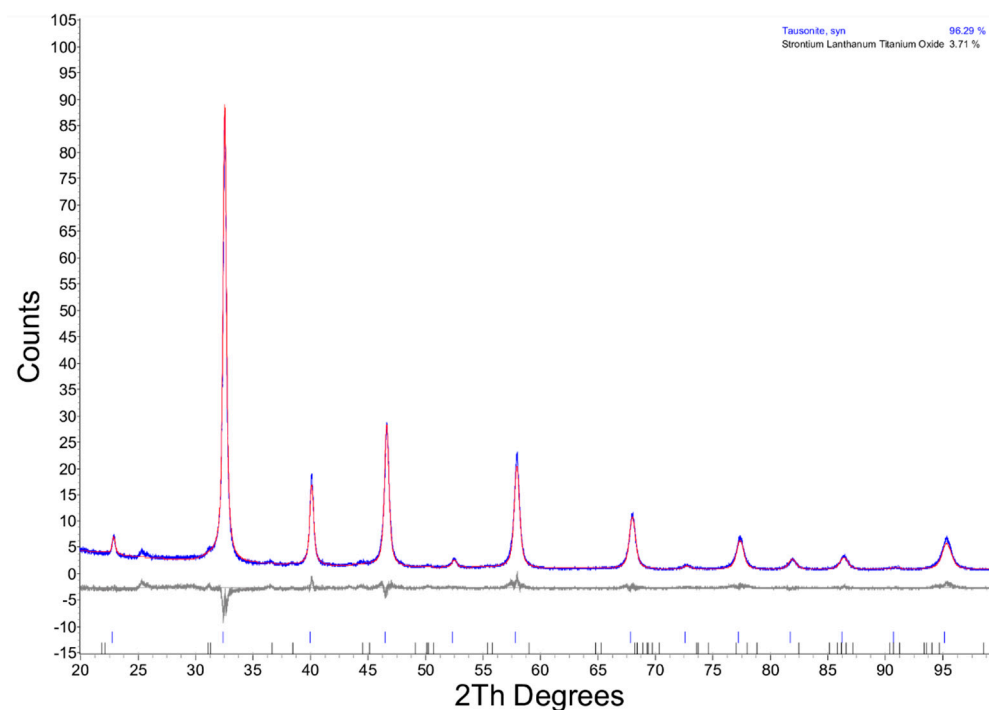

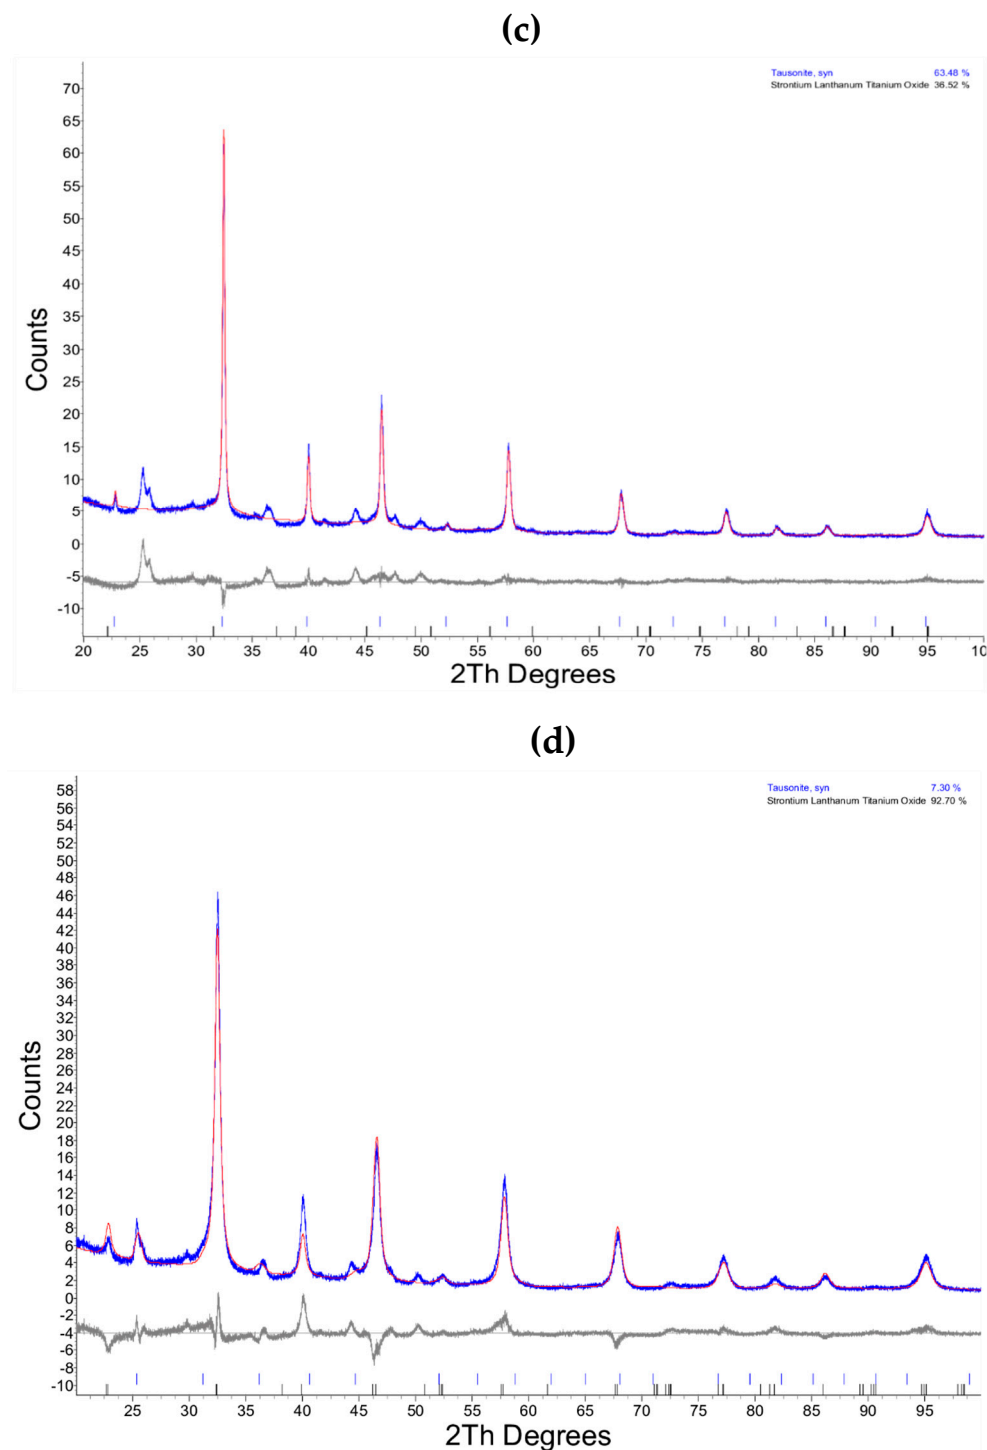

**Figure S2.** Rietveld refinement analysis of (a) solid state , (b) sol-gel, (c) hydrothermal and (d) coprecipitation LSTN samples before exsolution. The red lines indicate experimental data, the blue lines indicate simulated data, the lower grey traces indicate the difference between experimental and simulated data, and the blue and black vertical lines at the bottom indicate bragg's positions of cubic Pm-3m structure (PDF card no. 00-005-0634) and tetragonal I4/mcm (PDF card no. 04-025-4518), respectively.

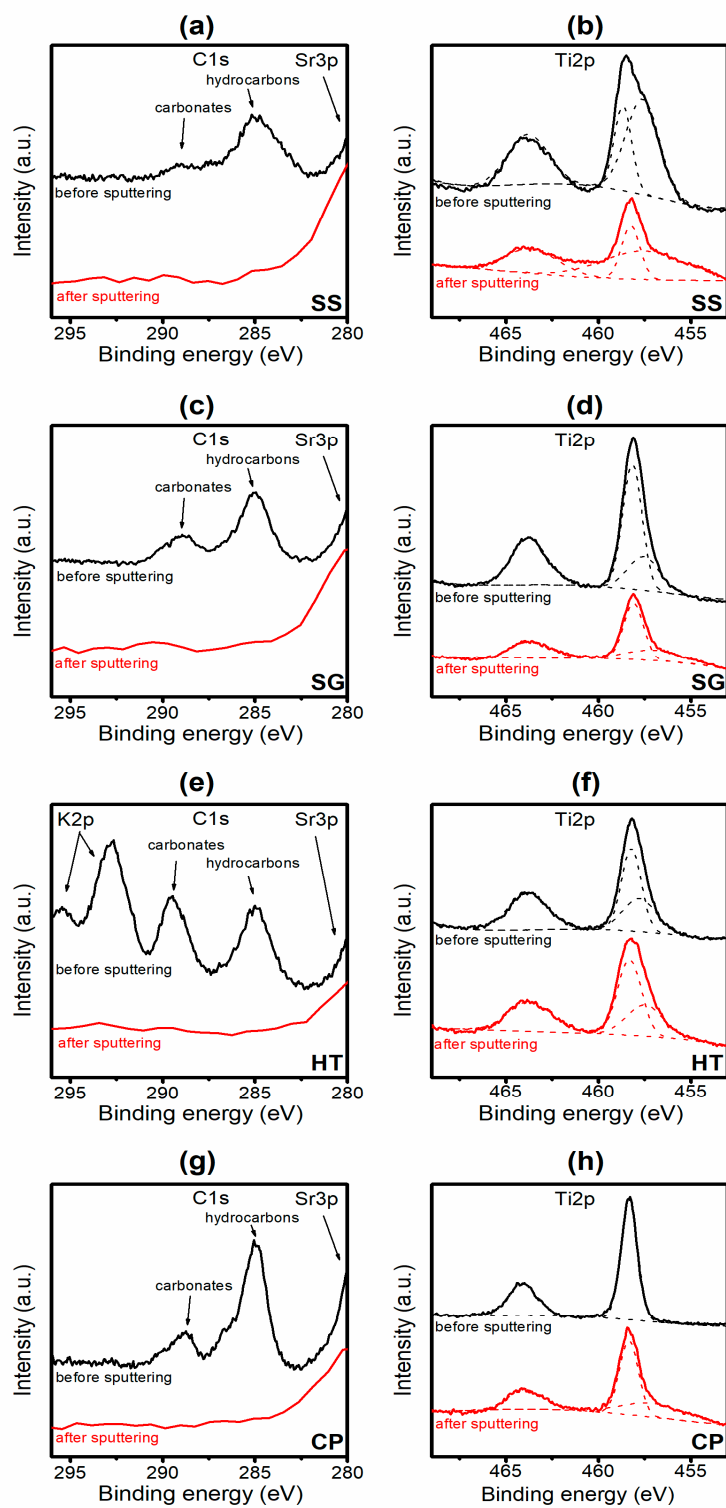

**Figure S3.** XPS spectra of C 1s and Ti 2p signals for LSTN powders before and after sputtering. (a) C 1s and (b) Ti 2p in solid state LSTN, (c) C 1s and (d) Ti 2p in sol-gel LSTN, (e) C 1s and (f) Ti 2p in hydrothermal LSTN, (g) C 1s and (h) Ti 2p in co-precipitation LSTN.

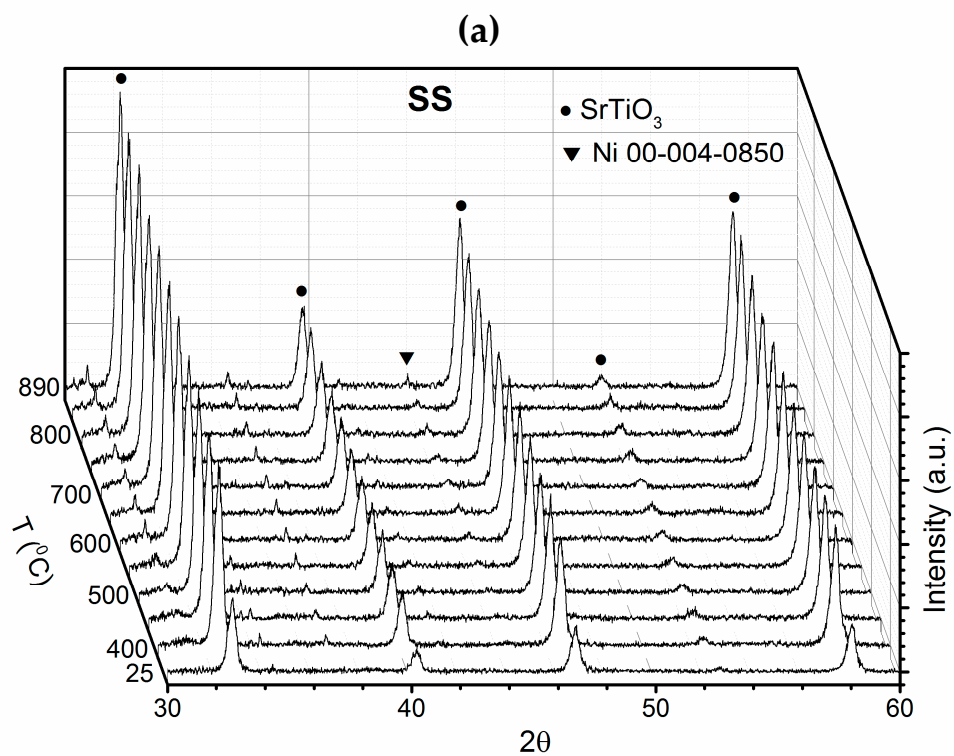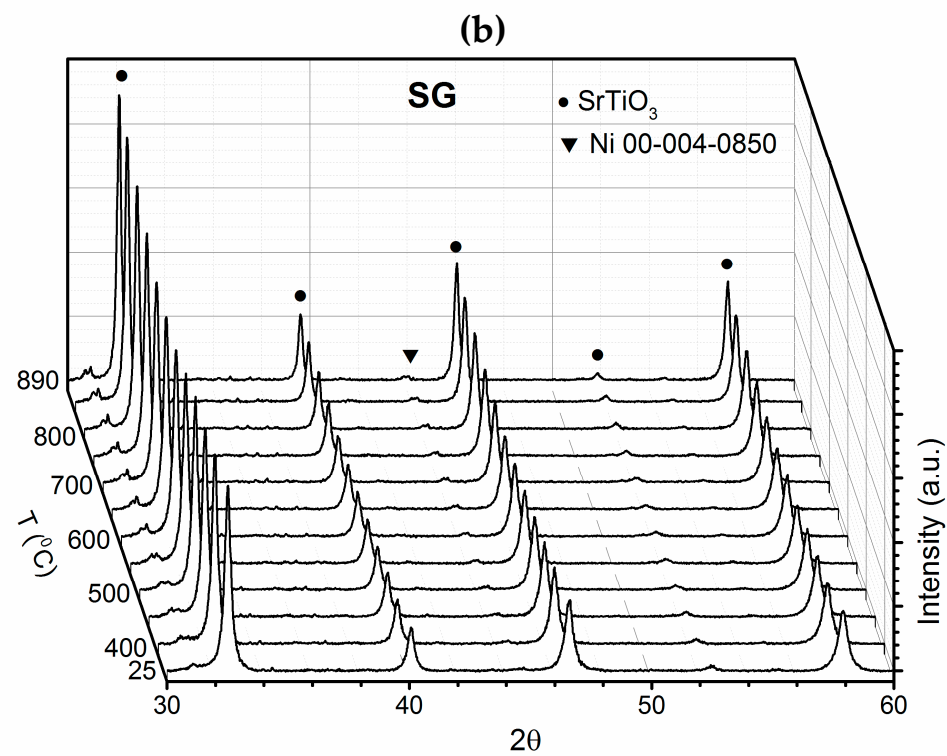

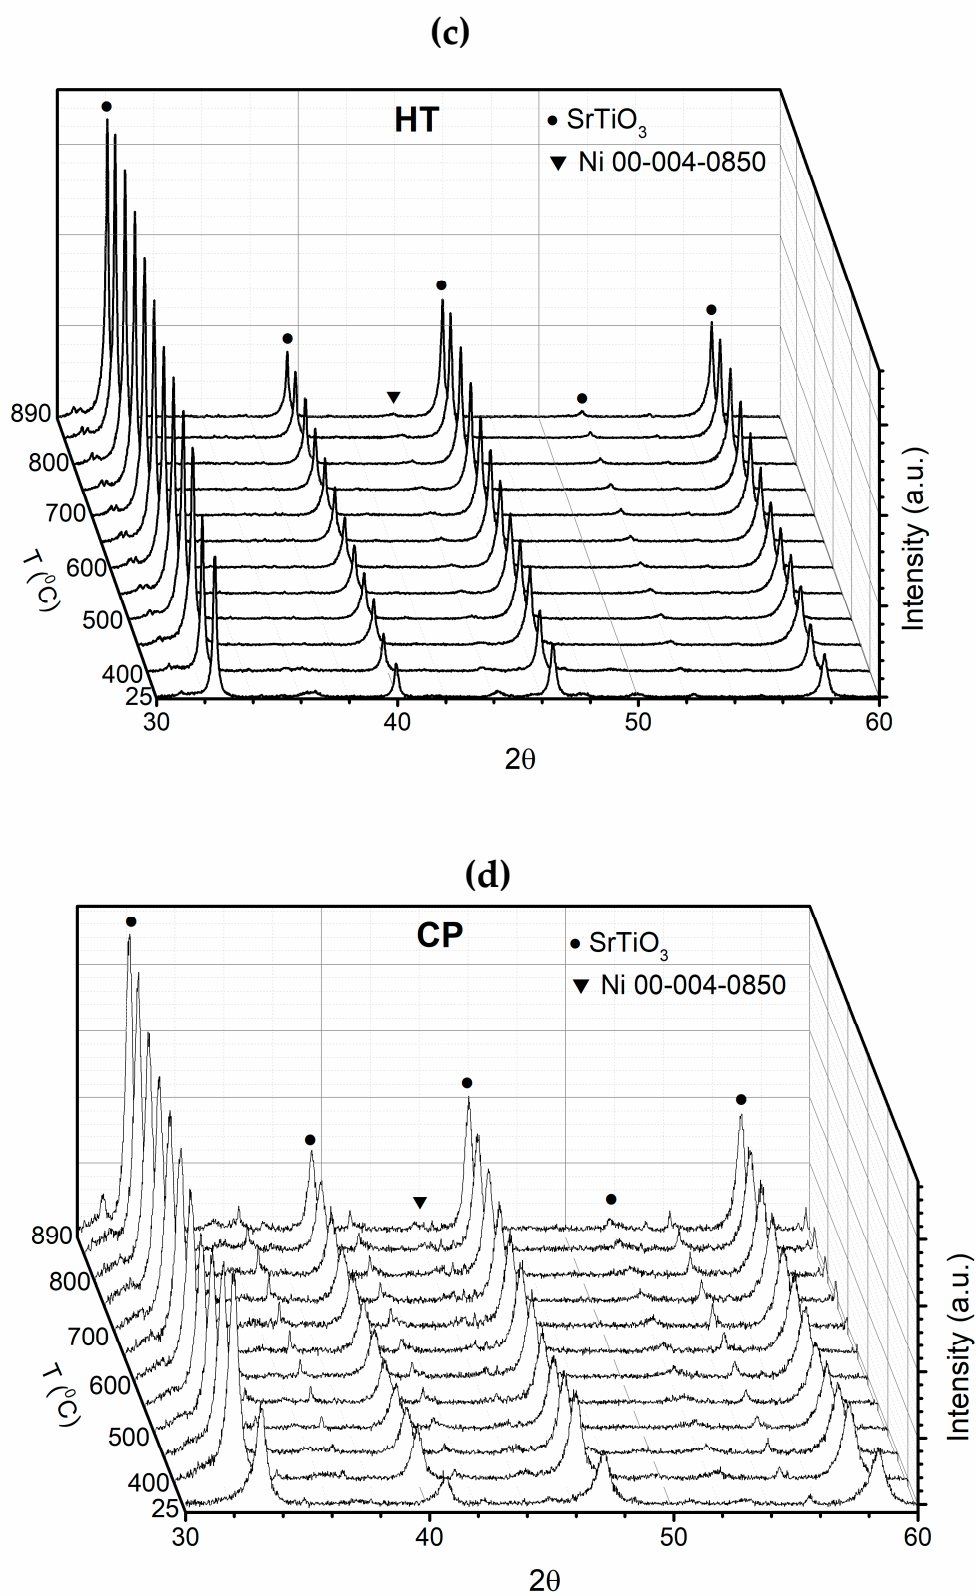

**Figure S4.** in situ XRD analysis of (a) solid state, (b) sol-gel, (c) hydrothermal, (d) coprecipitation LSTN powders under 5%  $\text{H}_2$  in  $\text{N}_2$  flow at R.T and between 400–890°C.



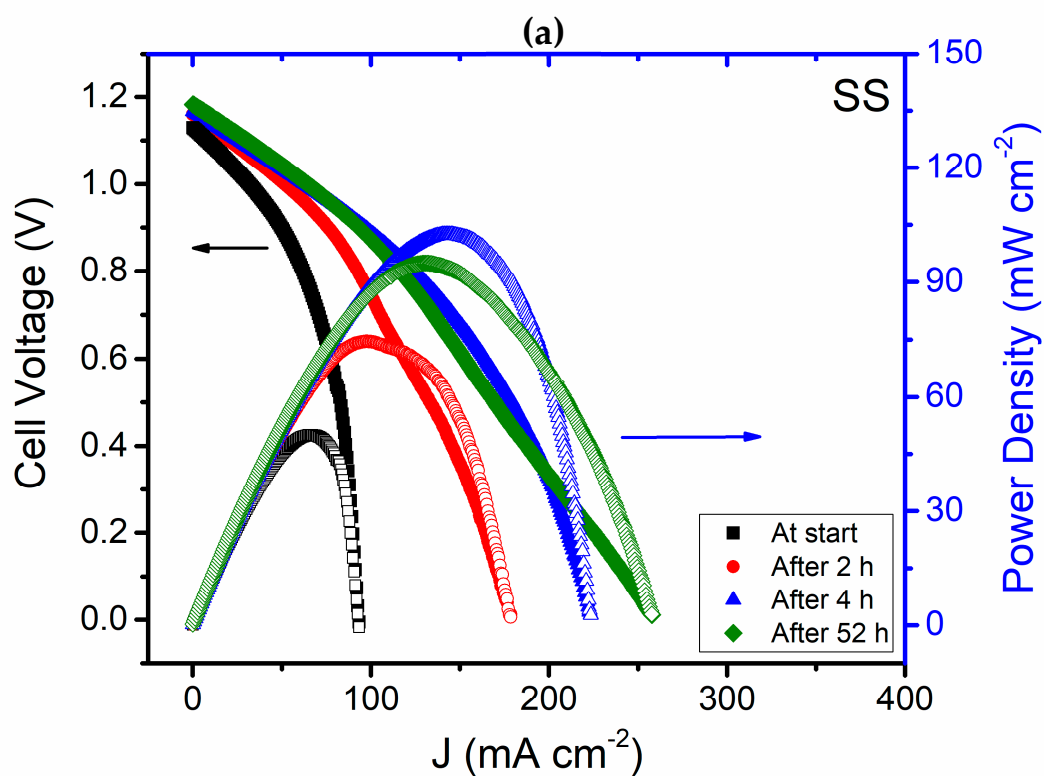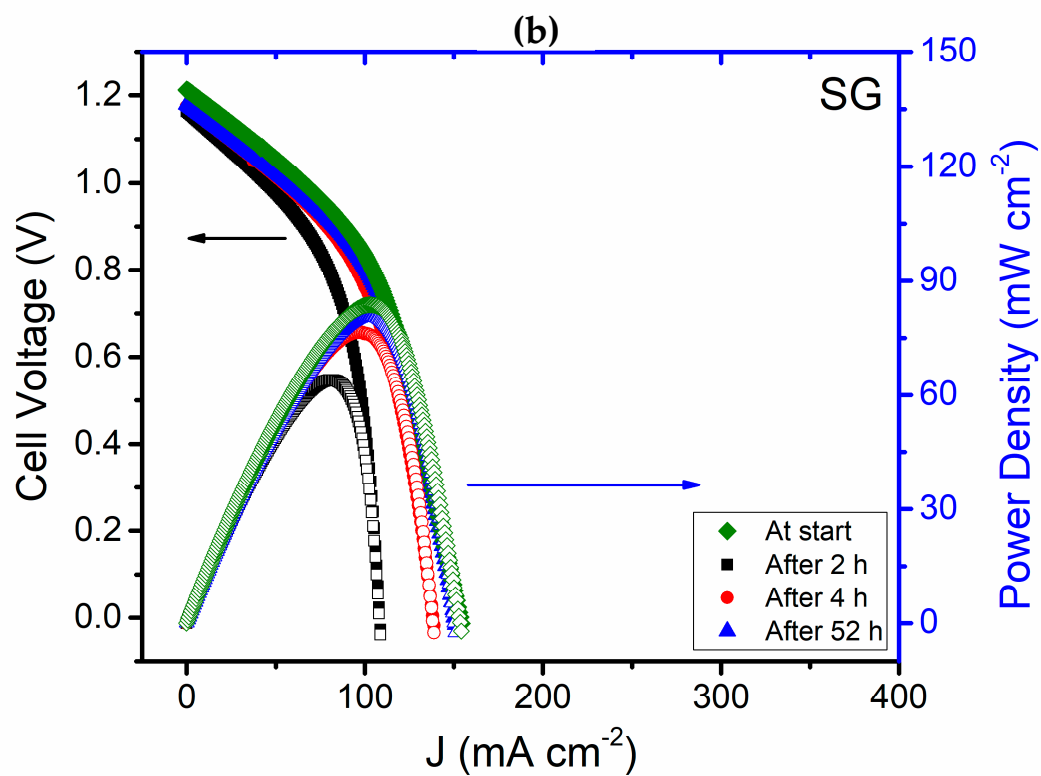

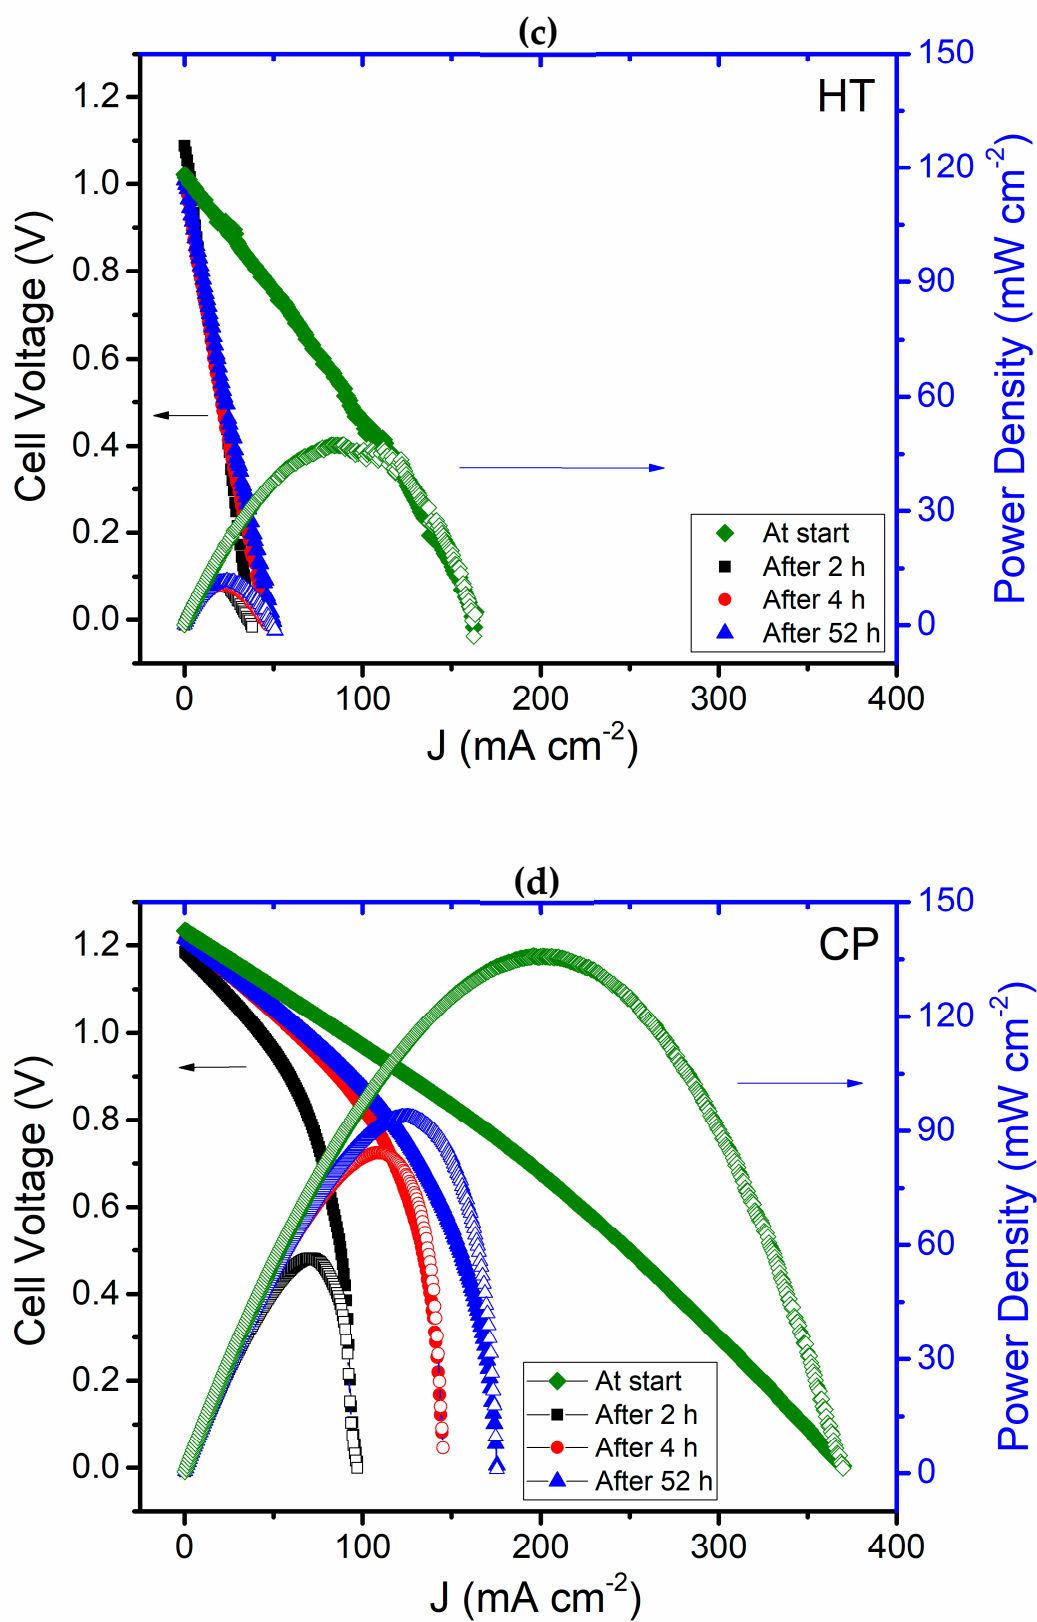

**Figure S5.** Polarization curves of fuel cells with of (a) solid state, (b) sol-gel, (c) hydrothermal, (d) coprecipitation LSTN-GDC anodes at different operation times at 820°C under 300  $\text{cm}^3/\text{min}$  dry  $\text{H}_2$  flow on anode side. The start time is defined when the cell reached the final operation temperature and hydrogen started to flow on the anode.

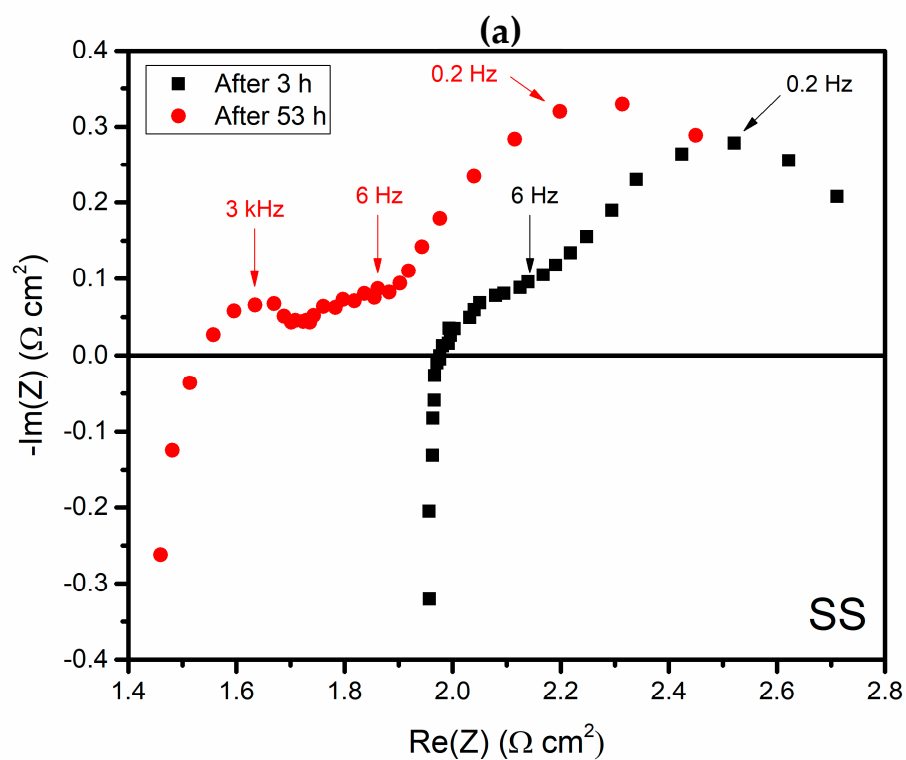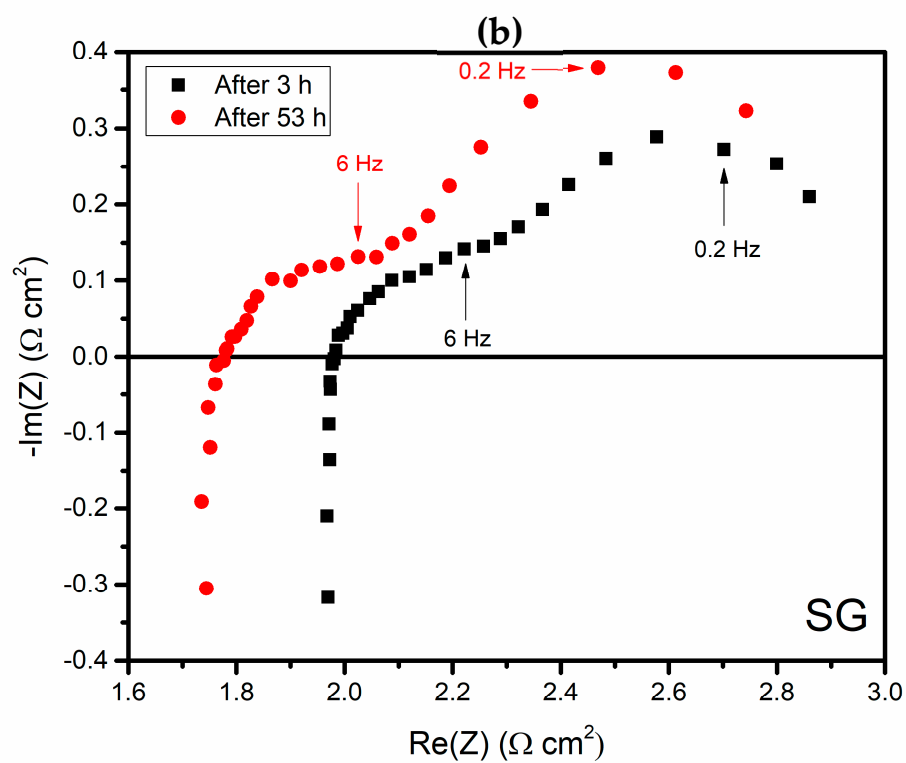

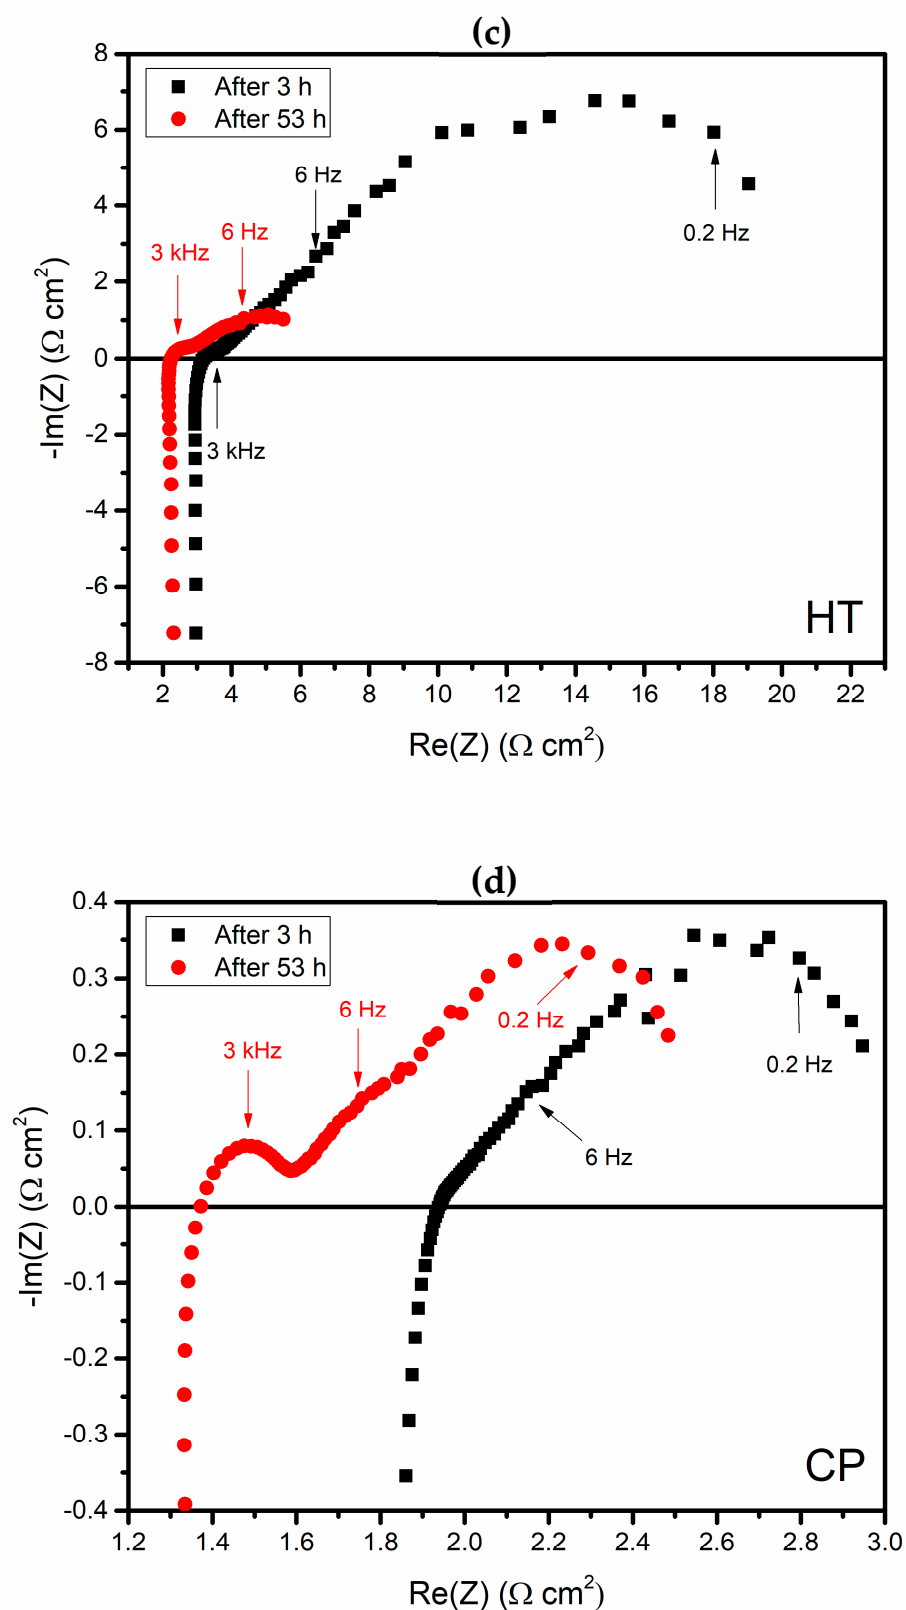

**Figure S6.** Impedance Nyquist plots of fuel cells with (a) solid state, (b) sol-gel, (c) hydrothermal, (d) coprecipitation LSTN-GDC anodes before and after 48 hours stability test. High frequency (HF, 3 kHz), medium frequency (MF, 6 Hz) and low frequency (LF, 0.2 Hz) are indicated.

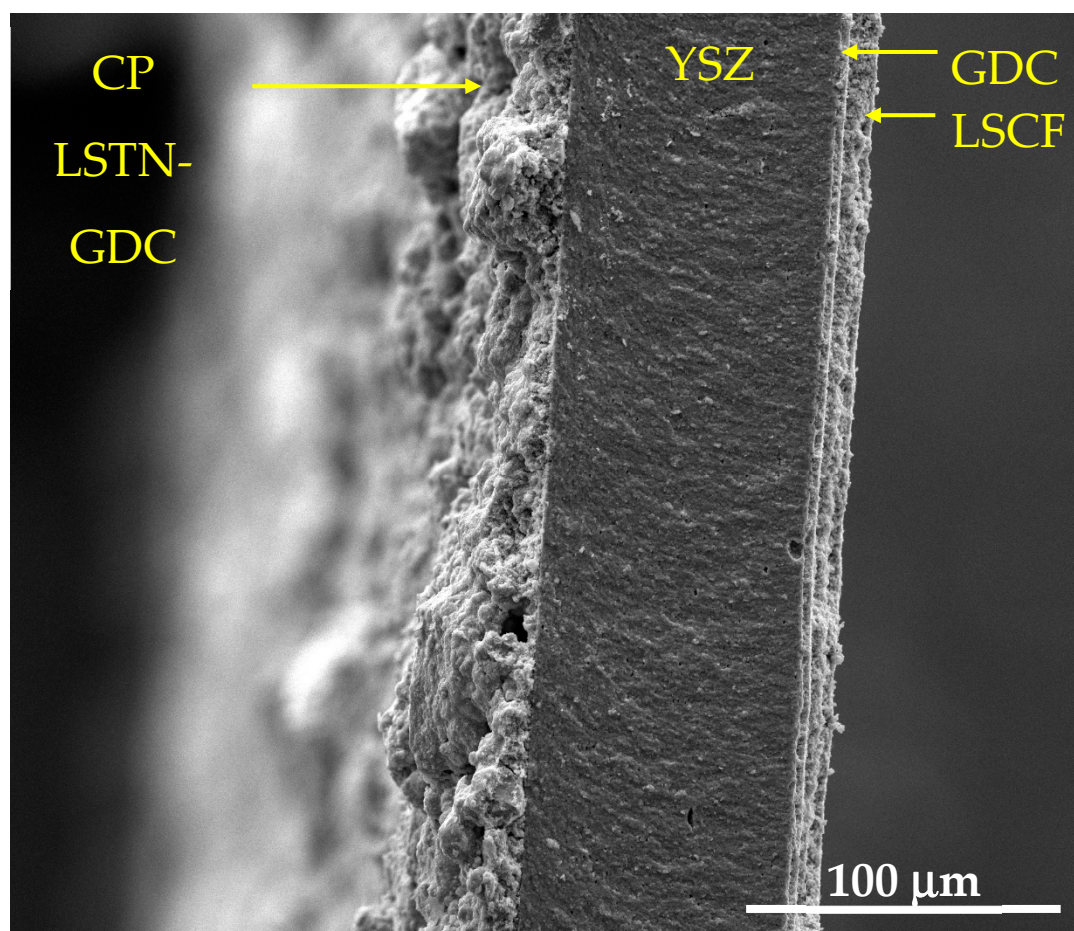

**Figure S7.** SEM micrograph of the cross-section of full fuel cell with CP LSTN-GDC anode after 48 hours stability testing.
